# Supplementary material for: Physiological release of endogenous tau is stimulated by neuronal activity
Source: PubMed Central journal article supplement — EMBO Rep. 2013 Feb 15;14(4):389–94. doi: 10.1038/embor.2013.15 (PMC3615658; doi:10.1038/embor.2013.15), 2013-02-15
Supplement: embor201315s1.pdf [file embor201315s1.pdf]

Suppl Fig 1.

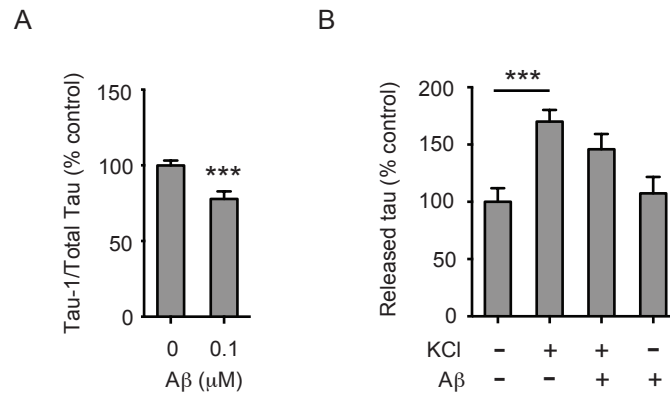

**Suppl Fig 1** The effect of  $\text{A}\beta_{1-42}$  pretreatment on KCl-induced stimulation of tau release. **(A)** Western blot analysis of intracellular tau shows that treatment of neurons with  $\text{A}\beta_{1-42}$  (0.1  $\mu\text{M}$ ; 24 h) significantly reduces levels of Tau-1 positive tau, relative to amounts of total tau. **(B)** Stimulation of neurons with KCl (50 mM, 30 min) significantly increased tau release. Neurons pre-treated with  $\text{A}\beta_{1-42}$  (0.1  $\mu\text{M}$ ; 24 h) released amounts of tau which were not statistically different from either untreated or KCl-stimulated neurons. Treatment with  $\text{A}\beta_{1-42}$  alone had no effect on tau release. Values represent mean  $\pm$  s.e.m. (N = 6); \*\*\*P < 0.001.
